# Supplementary material
Source: PubMed Central journal article supplement (PMC3722594)

**Crystal structure of an aspartic proteinase domain of the *Mycobacterium tuberculosis* cell surface antigen PE\_PGRS16**

Deivanayaga V Barathy and Kaza Suguna

**Supplementary information**

**Table S1.** Aspartic proteinases present in various species of *Mycobacterium*.

| Organism                               | Total no. of genes coding AP | Gene locus             |                         |                          |
|----------------------------------------|------------------------------|------------------------|-------------------------|--------------------------|
| <i>M. tuberculosis</i> H37Rv           | 3                            | Rv0977                 | Rv1983*                 | Rv2519*                  |
| <i>M. tuberculosis</i> H37Ra           | 3                            | MRA_0984               | MRA_1995                | MRA_2546                 |
| <i>M. tuberculosis</i> F11             | 3                            | TBFG_10995.4           | TBFG_12014.4            | TBFG_12540.4             |
| <i>M. tuberculosis</i> CDC 1551        | 2                            | —                      | MT2036                  | MT2595                   |
| <i>M. tuberculosis</i> Haarlem (draft) | 2                            | —                      | TBHG_01939.1            | TBHG_02455.1             |
| <i>M. tuberculosis</i> C               | 1                            | —                      | TBCG_01932.1            | —                        |
| <i>M. bovis</i> AF2122/97              | 3                            | Mb1002                 | Mb2005                  | Mb2548                   |
| <i>M. bovis</i> BCG                    | 2                            | BCG_1031               | —                       | BCG_2540                 |
| <i>M. africanum</i>                    | 3                            | MAF_09860              | MAF_19940               | MAF_25340                |
| <i>M. marinum</i>                      | 3                            | MMAR_2272 <sup>†</sup> | MMAR_2933 <sup>††</sup> | MMAR_1538 <sup>†††</sup> |

\* 43 % identical to Rv0977, <sup>†</sup> 45 % identical to Rv0977, <sup>††</sup> 69 % identical to Rv1983, <sup>†††</sup> 78 % identical to Rv2519

— Absent

All the proteins of mycobacterium species in the same column are 100 % identical to H37Rv proteins except the marinum species.

**Table S2.** Predicted subsites of Mtb-AP along with the known subsites of eukaryotic aspartic proteinases.

| Subsite          | Rhizopuspepsin (3APR) | Human pepsin (1PSO) | Mtb-AP |
|------------------|-----------------------|---------------------|--------|
| S <sub>4</sub>   | -                     | Met12               | -      |
|                  | Thr222                | Ser219              | Ile193 |
| S <sub>3</sub>   | -                     | Gln287              | -      |
|                  | Ile15                 | Met12               | -      |
|                  | Glu16                 | -                   | Glu18  |
|                  | -                     | Thr77               | -      |
|                  | -                     | Phe111              | Phe106 |
|                  | Thr221                | Gly217              | Gly191 |
| S <sub>2</sub>   | Thr222                | Ser219              | Ile193 |
|                  | Gly78                 | Gly76               | Ala65  |
|                  | Asp79                 | Thr77               | -      |
|                  | Thr221                | Thr218              | Gly192 |
|                  | Ile225                | -                   | -      |
|                  | -                     | Gln287              | -      |
|                  | -                     | Met289              | -      |
| S <sub>1</sub>   | Asp33                 | Val30               | Leu34  |
|                  | Asp35                 | Asp32               | Asp36  |
|                  | Tyr77                 | Tyr75               | Tyr64  |
|                  | -                     | Gly76               | Ala65  |
|                  | Asp79                 | Thr77               | -      |
|                  | Ser81                 | -                   | -      |
|                  | Phe114                | -                   | Phe106 |
|                  | Leu122                | Ile120              | Val115 |
|                  | Asp 218               | Asp215              | Asp189 |
|                  | Gly220                | Gly217              | Gly191 |
| S <sub>1</sub> ' | Gly37                 | -                   | Gly38  |
|                  | Tyr77                 | -                   | -      |
|                  | Gly78                 | -                   | Ala65  |
|                  | Ile216                | -                   | Met187 |
|                  | Asp218                | -                   | Asp189 |
|                  | Trp294                | -                   | -      |
|                  | Ile298                | -                   | Asn247 |
| S <sub>2</sub> ' | Gly37                 | Gly34               | Gly38  |
|                  | Ser38                 | Ser35               | Ser39  |
|                  | Ile75                 | -                   | Ala62  |
|                  | Ser76                 | -                   | Gly63  |
|                  | Ile130                | -                   | -      |
|                  | Trp194                | Tyr189              | -      |

**Figure S1** The His-tag peptide residues (cyan) bound to the active site are stabilized by the interactions with the protein residues (green), water molecules (red sphere) and ethylene glycol (labeled as EDO). The dashed lines show the hydrogen bonding interactions. The  $Zn^{2+}$  ion interacts with the two catalytic aspartates and two histidine residues from the tag. Protein residues which form van der Waals interactions are shown with 50% transparency.

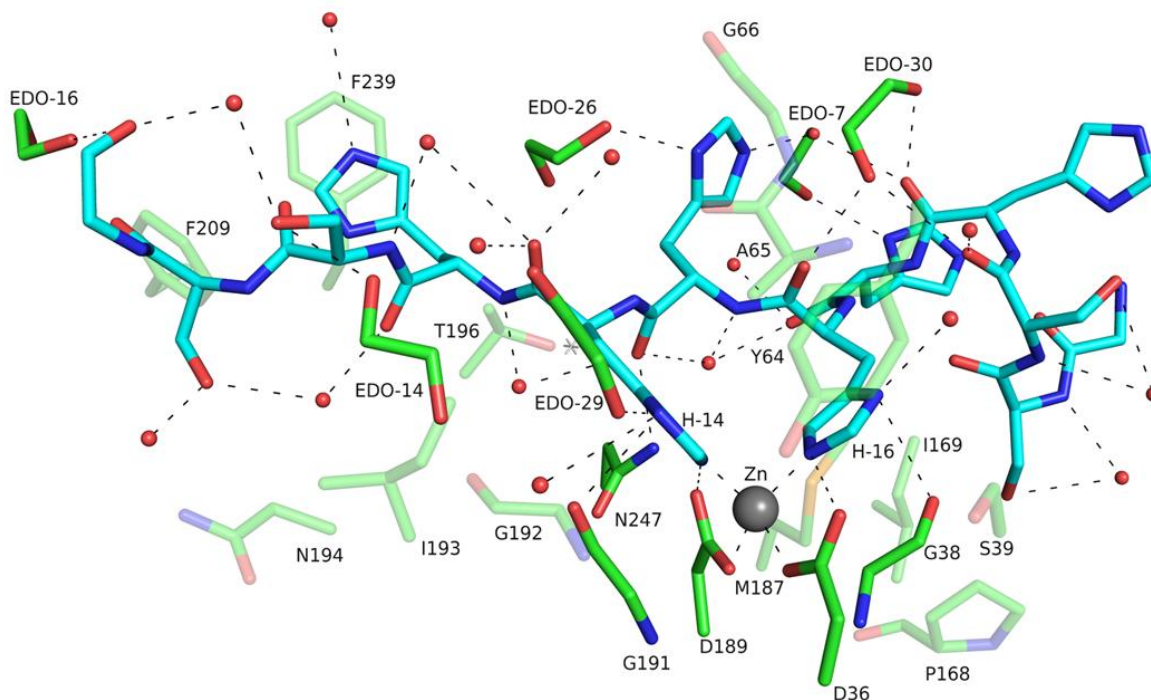

**Figure S2** CD spectra of different constructs of Mtb-AP.

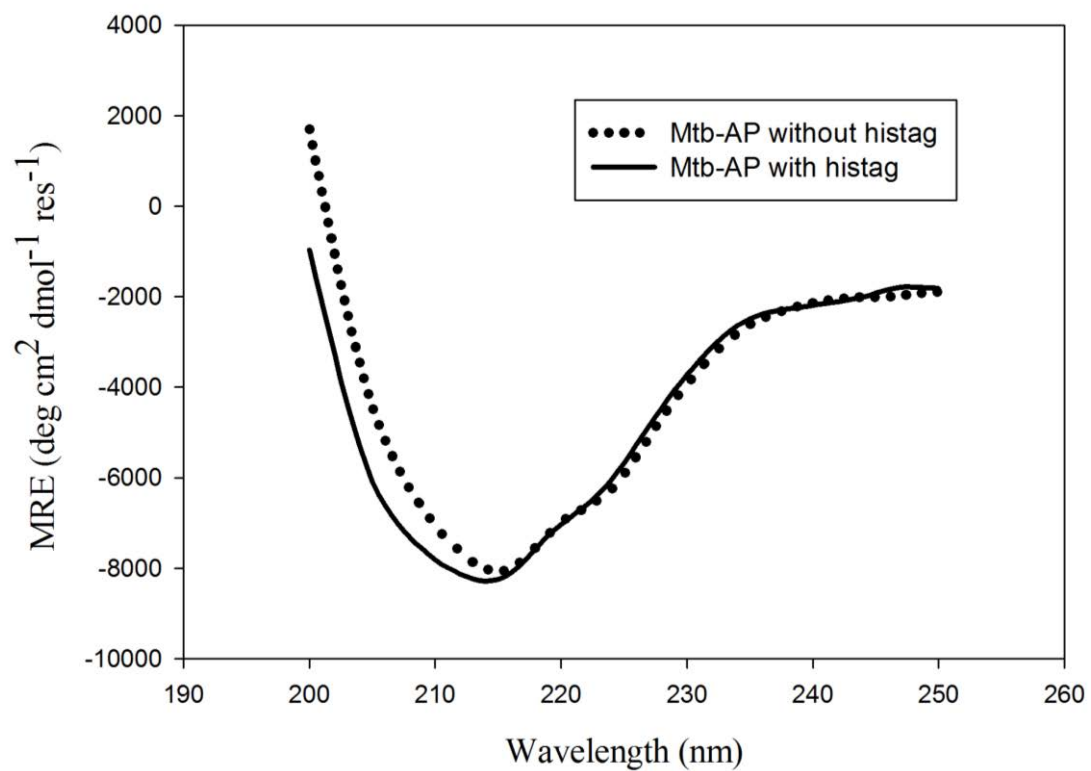

**Figure S3** Multiple sequence alignment of aspartic proteinases from Mycobacterium species. Rv denotes *M. tuberculosis* and MMAR denotes *M. marinum*. The DT/SG motif is shown in red. The N-terminal HHG motif and the sequence NTG which replaces the C-terminal HHG motif are shown in blue.

```

Rv0977      STTLTNATVPLQLVNTTEPVWFISLNGGQMPVLLDTGSTGLVMDSQFLT-----QNFGP 55
Rv1983      ----DGRTPLEIIHVTEPTVHANVNGGPTSTILVDTGSAGLVSPEDVGGILGLVHMGL 56
Rv2519      --DPVNVAVPLRVENN-FPLVNLVNRGPTVPILLDTGSSSLVIPFWKIG----WQNLGL 53
MMAR_2272   -----PWTISVGGGPGIAVTVDTGASGLLVRPQDVN----LQSLGT 38
MMAR_2933   -----TVPLEVNVVTEPVVNVVNGGHSTPVLIDTGSAGLVMQVKDVGGLGLLRMGL 53
MMAR_1538   -----NASVPLYLDNN-FPAVNVSINGGSPVPLLDTGSAGLVVPIWDIG----LQNLGV 50
              * *   :. *   .: :***:..*::   :           :*

Rv0977      VIGTGTAGYAGG----LTYNYNTYSTTVDFGNGLLTLPTSVM----VVTSS--SPGTLGN 105
Rv1983      PTGLSISGYSGG----LYYIFATYTTTVDFGNIVTAPTAVNVVLLSIPTSPFAISTYFS 112
Rv2519      PTGFDVVHYGNG----VSIYVADVPTTVDFGGGAATTPSVHVGILPYPRNLDSLVLIAS 109
MMAR_2272   PTGSGAVTYGNSSYAFNTVQYQTYQTTVDFGNIVTNPNTN----AVATS--ATQTING 91
MMAR_2933   PSGISMSAYSGG----LTYLFATYPTTVDFGNIVTSTTGVDVWLFISIPTSPYALTTWLN 109
MMAR_1538   PTGFDVIRYGNG----VNILYADFNTTVDFGSGAVTAPTSVQVGI LFPPTS LQGLTLIAM 106
              * .   *...   :   ***:*. * * . * *   . . .

Rv0977      FLRSRGAVG-----VLGIGPNNG---FPGT-SSIVTAMPGLLNNGLIDESA 148
Rv1983      ALLADPTTTPFEAYFGAVGVDGLVGVGPNV---GPGP-SIPTMALPGDLNQGVLIDAPA 168
Rv2519      GGAFGPNGN-----GILGIGPNVGSYAVSGPGNVVTTDLPGQLNEGTLIDIPG 157
MMAR_2272   VTTSIPLSS-----LPLYLIGPNND---FPLP-DQVTAALPGDLNQGVLINTNL 137
MMAR_2933   ALWSNPLTTPFDAYFQSAGVDGLVGVGPNV---GPGP-SIPTQALGGGLGQGLLIDMKG 165
MMAR_1538   GNGFGPTGH-----GVLGIGPNIN-AATGGHGNVVTALPGQLNEGELINIPQ 153
              **:***   . .   : * *.:* **;

Rv0977      GILQFGPNTL-TGGITISGAPISTVAVQID----NGPLQQAP-VMFDSGGINGTIPSALA 202
Rv1983      GELVFGPNPLPAPNVEVVGSPITTLVYKID----GGTPIPVP-SIIDSGGVTGTIPSYVI 223
Rv2519      GYMQFGPNTG-TPITSVTGAPITVLNVQIGGYDPNGGYWSLP-SIFDSGGNHGTLPVAIL 215
MMAR_2272   GYLQFGANPL-TPVASVTGSPVTDLQIQIN----NGPLQPATGSFIDSGGLYGTIPSSLI 192
MMAR_2933   GELVFGPNPL-TPEFISGAPIATLWVSVN----GGAPVAVP-SIIDSGGVMGTIPSSVI 219
MMAR_1538   GYMQFGPNTG-TPITSVSGVPITTLDVQFGGYDPLGTYYPVT-SIVDSGGNHGTIPGIIL 211
              * : **.*. :   : * *.: : :...   *   . :.**** **:* :

Rv0977      S-LPSGGFVPAGTTISVYTSDGQTL LLYSYTTTATNTPFVTSGG-VMNTGHVPFAQQPIYV 260
Rv1983      G----SGTLPANTNIEVYTS-PGGDRLYAFNTNDYRPTVISSG-LMNTGFLPFRFQPVYI 277
Rv2519      GTGQTTGYAPPGTVISISIHNDQTL LLYQYTTTASNTP-SVVTADPRLNTGLTPFLLGPVYI 274
MMAR_2272   PGVPVGYSVPGTITVYTTDGVQLYSQTVTGSTNAPLVVPSNNPFBNTGNYPFLLGPIYI 252
MMAR_2933   G----GSTLPANTNITVYTDNTMTTEVYHYSTNDYQPTVISSG-LMNTGFLPFWNPVYI 274
MMAR_1538   GTGQTSGVVPPGTVISISTNDNQTL LLYSYTTTGTDSP-VVTGNIPMNTGLLPFALGPVYI 270
              * * * :   .   * * ... :*** ** *.*:

Rv0977      SYSPTAIGTTTFN---- 273
Rv1983      DYSPSIGTTVFDHPA- 293
Rv2519      SNNPSGVGTWVFNYPPP 291
MMAR_2272   SNSPTGGGQTI FDF --- 266
MMAR_2933   DYSPAGTGTTFVDMPP-- 289
MMAR_1538   SNSPSGVGTWVFNYPPP 287
              . .*:. * . *:

```

**Figure S4** Structure-based sequence alignment of Mtb-AP with Bla g 2 (1YG9), bovine chymosin (4CMS) and porcine pepsin (3PEP) shows the insertion of alanine residue in Mtb-AP analogous to phenylalanine in Bla g 2 in the flap region.

|           |    |                   |                           |                                |            |
|-----------|----|-------------------|---------------------------|--------------------------------|------------|
|           |    |                   | ↓                         |                                |            |
| MTAP .pdb | 46 | -----FLTQNF-G-PVI | GTGTAGY                   | AGGLTYNYNTYSTTVDFGNGLLTLPTS    | VNVVTS 95  |
| 1YG9 .pdb | 55 | CPNLQKY-EK--LKP   | KYISDGNVQVKF              | FDTGSAVGRGIEDSLTISQ-LTTSQQD    | IVLADE 110 |
| 4CMS .pdb | 54 | N--HQ             | RFDPRKSSTFQ-NLGKPLSIHY-GT | GSMQGILGYDTVTVSN-IVDIQQTVGLSTQ | 108        |
| 3pep .pdb | 52 | D--HNQ            | FNPDDSSTFE-ATSQELSITY-GT  | GSMTGILGYDTVQVGG-ISDTNQIFGLSET | 106        |

**Figure S5** Conformation of the flap residue tyrosine. (A) Tyrosine of Mtb-AP (green; Y64) is in a different conformation from that of other aspartic proteinases like porcine pepsin (brown; Y75) and rhizopuspepsin (grey; Y77). (B) The tyrosine of Mtb-AP has the same conformation as in the self-inhibited states of chymosin (pink; Y75) and saccharopepsin (cyan; Y75).

**A**

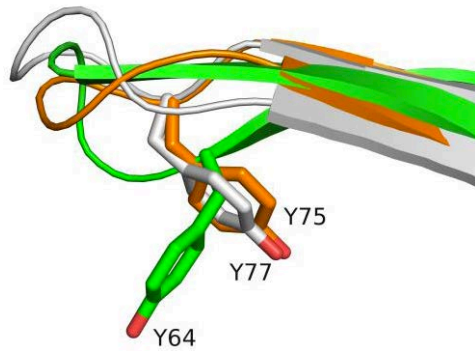

**B**

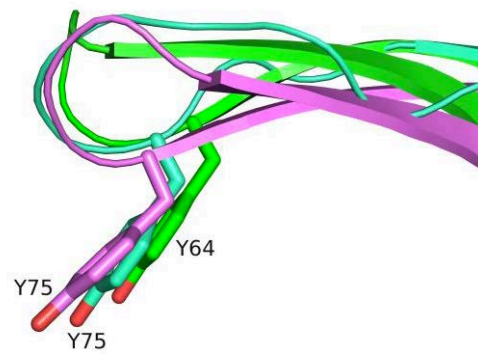

Supplement: mmc1.pdf [file mmc1.pdf]
